# Supplementary material for: Degree of Blood Pressure Control and Incident Diabetes Mellitus in Chinese Adults With Hypertension
Source: PubMed Central journal article supplement — J Am Heart Assoc. 2020 Aug 5;9(16):e017015. doi: 10.1161/JAHA.120.017015 (PMC7660809; doi:10.1161/jaha.120.017015), 2020-08-05

# **SUPPLEMENTAL MATERIAL**

**Table S1. Characteristics of the included and excluded population \***

| <b>Variables</b>                    | <b>Included population</b> | <b>Non-included population</b> |
|-------------------------------------|----------------------------|--------------------------------|
| N                                   | 16953                      | 3749                           |
| Age, y                              | 60.0 ± 7.4                 | 59.8 ± 8.1                     |
| Male, No. (%)                       | 6827 (40.3)                | 1670 (44.5)                    |
| Body mass index, kg/m <sup>2</sup>  | 25.0 ± 3.7                 | 24.5 ± 3.8                     |
| Current smoking, No. (%)            | 3882 (22.9)                | 987 (26.3)                     |
| Current alcohol drinking, No. (%)   | 3999 (23.6)                | 961 (25.6)                     |
| Family history of diabetes, No. (%) | 750 (4.4)                  | 143 (3.8)                      |
| Enalapril group, No. (%)            | 8504 (50.2)                | 1850 (49.3)                    |
| <b>BP, mmHg</b>                     |                            |                                |
| SBP at baseline                     | 167.2 ± 20.4               | 165.3 ± 20.1                   |
| DBP at baseline                     | 94.2 ± 11.9                | 93.8 ± 12.0                    |
| Time-averaged on-treatment SBP      | 139.0 ± 10.6               | 141.4 ± 12.3                   |
| Time-averaged on-treatment DBP      | 82.7 ± 7.2                 | 84.2 ± 8.3                     |
| <b>Laboratory results</b>           |                            |                                |
| Total cholesterol, mmol/L           | 5.5 ± 1.2                  | 5.5 ± 1.2                      |
| Triglycerides, mmol/L               | 1.4 (1.1, 2.0)             | 1.4 (1.1, 1.9)                 |
| Fasting glucose, mg/dL              | 105.0 ± 30.9               | 101.3 ± 28.3                   |
| Creatinine, μmol/L                  | 65.6 ± 17.1                | 67.9 ± 28.0                    |
| Folate, ng/mL                       | 8.0 (5.6, 10.4)            | 8.3 (5.7, 11.0)                |
| <b>Medication use, No. (%)</b>      |                            |                                |
| Antihypertensive drugs              | 7953 (46.9)                | 1583 (42.2)                    |
| Lipid lowering drugs                | 145 (0.9)                  | 21 (0.6)                       |
| Antiplatelet drugs                  | 522 (3.1)                  | 85 (2.3)                       |

\*Continuous variables are presented as Mean ± SDs or medians (25<sup>th</sup> percentile, 75<sup>th</sup> percentile) Categorical variables are presented as n (%).

BP, blood pressure; DBP, diastolic blood pressure; HDL-C, high-density lipoprotein; *MTHFR*, methylenetetrahydrofolate reductase; SD, standard deviation; SBP, systolic blood pressure; tHcy, total homocysteine.

**Table S2. Characteristics of participants with or without incident diabetes \***

| <b>Variables</b>                    | <b>Participants with incident diabetes</b> | <b>Participants without incident diabetes</b> | <b>P value</b> |
|-------------------------------------|--------------------------------------------|-----------------------------------------------|----------------|
| N                                   | 1628                                       | 13350                                         |                |
| Age, y                              | 60.4 ± 7.4                                 | 60.0 ± 7.4                                    | 0.020          |
| Male, No. (%)                       | 658 (40.4)                                 | 5452 (40.8)                                   | 0.744          |
| Body mass index, kg/m <sup>2</sup>  | 25.9 ± 3.9                                 | 24.8 ± 3.6                                    | <0.001         |
| Current smoking, No. (%)            | 389 (23.9)                                 | 3146 (23.6)                                   | 0.361          |
| Current alcohol drinking, No. (%)   | 371 (22.8)                                 | 3212 (24.1)                                   | 0.106          |
| Family history of diabetes, No. (%) | 89 (5.5)                                   | 464 (3.5)                                     | <0.001         |
| Enalapril group, No. (%)            | 802 (49.3)                                 | 6700 (50.2)                                   | 0.481          |
| <b>BP, mmHg</b>                     |                                            |                                               |                |
| SBP at baseline                     | 168.1 ± 21.1                               | 166.8 ± 20.3                                  | 0.013          |
| DBP at baseline                     | 94.5 ± 11.8                                | 94.2 ± 11.9                                   | 0.298          |
| Time-averaged on-treatment SBP      | 141.0 ± 11.1                               | 138.5 ± 10.4                                  | <0.001         |
| Time-averaged on-treatment DBP      | 83.2 ± 7.5                                 | 82.8 ± 7.2                                    | 0.034          |
| <b>Laboratory results</b>           |                                            |                                               |                |
| Total cholesterol, mmol/L           | 5.5 ± 1.2                                  | 5.5 ± 1.1                                     | 0.063          |
| Triglycerides, mmol/L               | 1.6 (1.1, 2.2)                             | 1.4 (1.0, 1.9)                                | <0.001         |
| Fasting glucose, mg/dL              | 104.3 ± 13.1                               | 96.2 ± 12.1                                   | <0.001         |
| Creatinine, μmol/L                  | 64.4 ± 15.2                                | 66.0 ± 16.6                                   | <0.001         |
| Folate, ng/mL                       | 7.7 (5.5, 10.0)                            | 8.0 (5.6, 10.4)                               | 0.005          |
| <b>Medication use, No. (%)</b>      |                                            |                                               |                |
| Antihypertensive drugs              | 846 (52.0)                                 | 6042 (45.3)                                   | <0.001         |
| Lipid lowering drugs                | 12 (0.7)                                   | 101 (0.8)                                     | 0.932          |
| Antiplatelet drugs                  | 49 (3.0)                                   | 400 (3.0)                                     | 0.976          |

\*Continuous variables are presented as Mean ± SDs or medians (25<sup>th</sup> percentile, 75<sup>th</sup> percentile) Categorical variables are presented as n (%).

BP, blood pressure; DBP, diastolic blood pressure; HDL-C, high-density lipoprotein cholesterol; *MTHFR*, methylenetetrahydrofolate reductase; SD, standard deviation; SBP, systolic blood pressure; tHcy, total homocysteine.

**Table S3. Concomitant medication usage during the treatment period by time-averaged on-treatment systolic blood pressure (SBP) categories \***

| Medication, No. (%)      | Time-averaged on-treatment SBP Categories, mm Hg |             |             |             | P value |
|--------------------------|--------------------------------------------------|-------------|-------------|-------------|---------|
|                          | <120                                             | 120 to <130 | 130 to <140 | ≥140        |         |
| N                        | 263                                              | 2658        | 5878        | 6179        |         |
| Anti-hypertension drugs  |                                                  |             |             |             |         |
| Calcium channel blockers | 103 (39.2)                                       | 1677 (63.1) | 4843 (82.4) | 5652 (91.5) | <0.001  |
| Diuretics                | 47 (17.9)                                        | 822 (30.9)  | 2797 (47.6) | 4175 (67.6) | <0.001  |
| Beta-blockers            | 0 (0.0)                                          | 6 (0.2)     | 17 (0.3)    | 14 (0.2)    | 0.746   |
| Lipid-lowering drugs     | 0 (0.0)                                          | 3 (0.1)     | 11 (0.2)    | 7 (0.1)     | 0.625   |
| Antiplatelet drugs       | 1 (0.4)                                          | 14 (0.5)    | 54 (0.9)    | 46 (0.7)    | 0.226   |

\*Regular concomitant medication usage was defined as 180 or more cumulative days of taking the drug of interest.

**Table S4. Concomitant medication usage during the treatment period in participants with or without the development of incident diabetes\***

| <b>Medication, No. (%)</b> | <b>Participants with incident diabetes</b> | <b>Participants without incident diabetes</b> | <b>P value</b> |
|----------------------------|--------------------------------------------|-----------------------------------------------|----------------|
| N                          | 1628                                       | 13350                                         |                |
| Anti-hypertension drugs    |                                            |                                               |                |
| Calcium channel blockers   | 1369 (84.1)                                | 10906 (81.7)                                  | 0.018          |
| Diuretics                  | 898 (55.2)                                 | 6943 (52.0)                                   | 0.016          |
| Beta-blockers              | 3 (0.2)                                    | 34 (0.3)                                      | 0.589          |
| Lipid-lowering drugs       | 4 (0.2)                                    | 17 (0.1)                                      | 0.228          |
| Antiplatelet drugs         | 10 (0.6)                                   | 105(0.8)                                      | 0.452          |

\*Regular concomitant medication usage was defined as 180 or more cumulative days of taking the drug of interest.

**Table S5. Association between time-averaged on-treatment blood pressure (BP) and incident diabetes, with further adjustment for the use of beta blockers, lipid-lowering drugs or antiplatelet drugs during the treatment period**

| BP, mmHg                                  | N    | No. of events (%) | Crude Model       |         | Adjusted Model*   |         |
|-------------------------------------------|------|-------------------|-------------------|---------|-------------------|---------|
|                                           |      |                   | OR (95%CI)        | P value | OR (95%CI)        | P value |
| <b>Time-averaged on-treatment SBP</b>     |      |                   |                   |         |                   |         |
| <120                                      | 263  | 23 (8.7)          | 1.20 (0.76, 1.88) | 0.435   | 1.24 (0.78, 1.99) | 0.360   |
| 120 to <130                               | 2658 | 197 (7.4)         | <i>ref.</i>       |         | <i>ref.</i>       |         |
| 130 to <140                               | 5878 | 606 (10.3)        | 1.44 (1.21, 1.70) | <0.001  | 1.37 (1.15, 1.64) | <0.001  |
| ≥140                                      | 6179 | 802 (13.0)        | 1.86 (1.58, 2.19) | <0.001  | 1.67 (1.39, 2.01) | <0.001  |
| <b>Time-averaged on-treatment DBP</b>     |      |                   |                   |         |                   |         |
| <70                                       | 491  | 42 (8.6)          | 0.80 (0.57, 1.11) | 0.172   | 0.76 (0.53, 1.07) | 0.115   |
| 70 to <80                                 | 4788 | 504 (10.5)        | <i>ref.</i>       |         | <i>ref.</i>       |         |
| 80 to <90                                 | 7434 | 814 (10.9)        | 1.05 (0.93, 1.18) | 0.461   | 1.13 (0.98, 1.30) | 0.088   |
| ≥90                                       | 2265 | 268 (11.8)        | 1.14 (0.97, 1.34) | 0.101   | 1.31 (1.06, 1.61) | 0.012   |
| <b>Time-averaged on-treatment SBP/DBP</b> |      |                   |                   |         |                   |         |
| <130 and <80                              | 1603 | 125 (7.8)         | <i>ref.</i>       |         | <i>ref.</i>       |         |
| 130 to <140 and/or 80 to <90              | 6618 | 651 (9.8)         | 1.29 (1.06, 1.58) | 0.012   | 1.24 (1.01, 1.54) | 0.044   |
| ≥140 and/or ≥90                           | 6757 | 852 (12.6)        | 1.71 (1.40, 2.08) | <0.001  | 1.54 (1.24, 1.92) | <0.001  |

\*Adjusted for age, sex, study center, body mass index (BMI), smoking, family history of diabetes, SBP, DBP, fasting glucose (FG), total cholesterol (TC), triglycerides (TG), creatinine, folate and the use of antihypertensive drugs at baseline, as well as use of calcium channel blockers (CCB), diuretics, beta blockers, lipid-lowering drugs or antiplatelet drugs during the treatment period.

DBP, diastolic blood pressure; SBP, systolic blood pressure.

**Table S6. Association between time-averaged on-treatment blood pressure (BP) and incident diabetes, with further adjustment for the treatment (enalapril or enalapril-folic acid) compliance during the treatment period**

| BP, mmHg                                  | N    | No. of events (%) | Crude Model       |         | Adjusted Model*   |         |
|-------------------------------------------|------|-------------------|-------------------|---------|-------------------|---------|
|                                           |      |                   | OR (95%CI)        | P value | OR (95%CI)        | P value |
| <b>Time-averaged on-treatment SBP</b>     |      |                   |                   |         |                   |         |
| <120                                      | 263  | 23 (8.7)          | 1.20 (0.76, 1.88) | 0.435   | 1.26 (0.79, 2.01) | 0.335   |
| 120 to <130                               | 2658 | 197 (7.4)         | <i>ref.</i>       |         | <i>ref.</i>       |         |
| 130 to <140                               | 5878 | 606 (10.3)        | 1.44 (1.21, 1.70) | <0.001  | 1.35 (1.13, 1.62) | <0.001  |
| ≥140                                      | 6179 | 802 (13.0)        | 1.86 (1.58, 2.19) | <0.001  | 1.61 (1.33, 1.94) | <0.001  |
| <b>Time-averaged on-treatment DBP</b>     |      |                   |                   |         |                   |         |
| <70                                       | 491  | 42 (8.6)          | 0.80 (0.57, 1.11) | 0.172   | 0.76 (0.54, 1.08) | 0.124   |
| 70 to <80                                 | 4788 | 504 (10.5)        | <i>ref.</i>       |         | <i>ref.</i>       |         |
| 80 to <90                                 | 7434 | 814 (10.9)        | 1.05 (0.93, 1.18) | 0.461   | 1.10 (0.96, 1.27) | 0.165   |
| ≥90                                       | 2265 | 268 (11.8)        | 1.14 (0.97, 1.34) | 0.101   | 1.23 (1.00, 1.52) | 0.053   |
| <b>Time-averaged on-treatment SBP/DBP</b> |      |                   |                   |         |                   |         |
| <130 and <80                              | 1603 | 125 (7.8)         | <i>ref.</i>       |         | <i>ref.</i>       |         |
| 130 to <140 and/or 80 to <90              | 6618 | 651 (9.8)         | 1.29 (1.06, 1.58) | 0.012   | 1.22 (0.99, 1.51) | 0.065   |
| ≥140 and/or ≥90                           | 6757 | 852 (12.6)        | 1.71 (1.40, 2.08) | <0.001  | 1.48 (1.18, 1.84) | <0.001  |

\*Adjusted for age, sex, study center, body mass index (BMI), smoking, family history of diabetes, SBP, DBP, fasting glucose (FG), total cholesterol (TC), triglycerides (TG), creatinine, folate and the use of antihypertensive drugs at baseline, as well as use of calcium channel blockers (CCB), diuretics or treatment (enalapril or enalapril-folic acid) compliance during the treatment period.

DBP, diastolic blood pressure; SBP, systolic blood pressure.

**Table S7. Association between time-averaged on-treatment blood pressure (BP) and incident diabetes with further adjustment for change in BMI (BMI at the exit minus that at baseline)**

| BP, mmHg                                  | N    | No. of events (%) | Crude Model       |         | Adjusted Model*   |         |
|-------------------------------------------|------|-------------------|-------------------|---------|-------------------|---------|
|                                           |      |                   | OR (95%CI)        | P value | OR (95%CI)        | P value |
| <b>Time-averaged on-treatment SBP</b>     |      |                   |                   |         |                   |         |
| <120                                      | 263  | 23 (8.7)          | 1.20 (0.76, 1.88) | 0.435   | 1.23 (0.76, 1.99) | 0.395   |
| 120 to <130                               | 2658 | 197 (7.4)         | <i>ref.</i>       |         | <i>ref.</i>       |         |
| 130 to <140                               | 5878 | 606 (10.3)        | 1.44 (1.21, 1.70) | <0.001  | 1.35 (1.12, 1.61) | 0.001   |
| ≥140                                      | 6179 | 802 (13.0)        | 1.86 (1.58, 2.19) | <0.001  | 1.60 (1.32, 1.93) | <0.001  |
| <b>Time-averaged on-treatment DBP</b>     |      |                   |                   |         |                   |         |
| <70                                       | 491  | 42 (8.6)          | 0.80 (0.57, 1.11) | 0.172   | 0.77 (0.54, 1.10) | 0.150   |
| 70 to <80                                 | 4788 | 504 (10.5)        | <i>ref.</i>       |         | <i>ref.</i>       |         |
| 80 to <90                                 | 7434 | 814 (10.9)        | 1.05 (0.93, 1.18) | 0.461   | 1.12 (0.97, 1.29) | 0.114   |
| ≥90                                       | 2265 | 268 (11.8)        | 1.14 (0.97, 1.34) | 0.101   | 1.23 (0.99, 1.52) | 0.057   |
| <b>Time-averaged on-treatment SBP/DBP</b> |      |                   |                   |         |                   |         |
| <130 and <80                              | 1603 | 125 (7.8)         | <i>ref.</i>       |         | <i>ref.</i>       |         |
| 130 to <140 and/or 80 to <90              | 6618 | 651 (9.8)         | 1.29 (1.06, 1.58) | 0.012   | 1.25 (1.01, 1.56) | 0.044   |
| ≥140 and/or ≥90                           | 6757 | 852 (12.6)        | 1.71 (1.40, 2.08) | <0.001  | 1.51 (1.21, 1.90) | <0.001  |

\*Adjusted for age, sex, study center, body mass index (BMI), smoking, family history of diabetes, SBP, DBP, fasting glucose (FG), total cholesterol (TC), triglycerides (TG), creatinine, folate and the use of antihypertensive drugs at baseline, as well as use of calcium channel blockers (CCB) or diuretics during the treatment period and change in BMI. DBP, diastolic blood pressure; SBP, systolic blood pressure.



**Table S8. Association between time-averaged on-treatment blood pressure (BP) and incident diabetes with further adjustment for averaged BMI (BMI at the exit plus that at baseline divided by 2)**

| BP, mmHg                                  | N    | No. of events (%) | Crude Model       |         | Adjusted Model*   |         |
|-------------------------------------------|------|-------------------|-------------------|---------|-------------------|---------|
|                                           |      |                   | OR (95%CI)        | P value | OR (95%CI)        | P value |
| <b>Time-averaged on-treatment SBP</b>     |      |                   |                   |         |                   |         |
| <120                                      | 263  | 23 (8.7)          | 1.20 (0.76, 1.88) | 0.435   | 1.23 (0.76, 1.99) | 0.395   |
| 120 to <130                               | 2658 | 197 (7.4)         | <i>ref.</i>       |         | <i>ref.</i>       |         |
| 130 to <140                               | 5878 | 606 (10.3)        | 1.44 (1.21, 1.70) | <0.001  | 1.35 (1.12, 1.61) | 0.001   |
| ≥140                                      | 6179 | 802 (13.0)        | 1.86 (1.58, 2.19) | <0.001  | 1.60 (1.32, 1.93) | <0.001  |
| <b>Time-averaged on-treatment DBP</b>     |      |                   |                   |         |                   |         |
| <70                                       | 491  | 42 (8.6)          | 0.80 (0.57, 1.11) | 0.172   | 0.77 (0.54, 1.10) | 0.150   |
| 70 to <80                                 | 4788 | 504 (10.5)        | <i>ref.</i>       |         | <i>ref.</i>       |         |
| 80 to <90                                 | 7434 | 814 (10.9)        | 1.05 (0.93, 1.18) | 0.461   | 1.12 (0.97, 1.29) | 0.114   |
| ≥90                                       | 2265 | 268 (11.8)        | 1.14 (0.97, 1.34) | 0.101   | 1.23 (0.99, 1.52) | 0.057   |
| <b>Time-averaged on-treatment SBP/DBP</b> |      |                   |                   |         |                   |         |
| <130 and <80                              | 1603 | 125 (7.8)         | <i>ref.</i>       |         | <i>ref.</i>       |         |
| 130 to <140 and/or 80 to <90              | 6618 | 651 (9.8)         | 1.29 (1.06, 1.58) | 0.012   | 1.25 (1.01, 1.56) | 0.044   |
| ≥140 and/or ≥90                           | 6757 | 852 (12.6)        | 1.71 (1.40, 2.08) | <0.001  | 1.51 (1.21, 1.90) | <0.001  |

\*Adjusted for age, sex, study center, body mass index (BMI), smoking, family history of diabetes, SBP, DBP, fasting glucose (FG), total cholesterol (TC), triglycerides (TG), creatinine, folate and the use of antihypertensive drugs at baseline, as well as use of calcium channel blockers (CCB) or diuretics during the treatment period and averaged BMI.

DBP, diastolic blood pressure; SBP, systolic blood pressure.

**Table S9. Association between time-averaged on-treatment blood pressure (BP) and incident diabetes with further adjustment for visit-to-visit variability (VTV) in blood pressure (BP) during the treatment period**

| BP, mmHg                                  | N    | No. of events (%) | Crude Model       |         | Adjusted Model*   |         |
|-------------------------------------------|------|-------------------|-------------------|---------|-------------------|---------|
|                                           |      |                   | OR (95%CI)        | P value | OR (95%CI)        | P value |
| <b>Time-averaged on-treatment SBP</b>     |      |                   |                   |         |                   |         |
| <120                                      | 263  | 23 (8.7)          | 1.20 (0.76, 1.88) | 0.435   | 1.24 (0.78, 1.98) | 0.368   |
| 120 to <130                               | 2658 | 197 (7.4)         | <i>ref.</i>       |         | <i>ref.</i>       |         |
| 130 to <140                               | 5878 | 606 (10.3)        | 1.44 (1.21, 1.70) | <0.001  | 1.37 (1.15, 1.64) | <0.001  |
| ≥140                                      | 6179 | 802 (13.0)        | 1.86 (1.58, 2.19) | <0.001  | 1.66 (1.38, 2.00) | <0.001  |
| <b>Time-averaged on-treatment DBP</b>     |      |                   |                   |         |                   |         |
| <70                                       | 491  | 42 (8.6)          | 0.80 (0.57, 1.11) | 0.172   | 0.75 (0.53, 1.07) | 0.109   |
| 70 to <80                                 | 4788 | 504 (10.5)        | <i>ref.</i>       |         | <i>ref.</i>       |         |
| 80 to <90                                 | 7434 | 814 (10.9)        | 1.05 (0.93, 1.18) | 0.461   | 1.13 (0.98, 1.30) | 0.088   |
| ≥90                                       | 2265 | 268 (11.8)        | 1.14 (0.97, 1.34) | 0.101   | 1.27 (1.03, 1.57) | 0.025   |
| <b>Time-averaged on-treatment SBP/DBP</b> |      |                   |                   |         |                   |         |
| <130 and <80                              | 1603 | 125 (7.8)         | <i>ref.</i>       |         | <i>ref.</i>       |         |
| 130 to <140 and/or 80 to <90              | 6618 | 651 (9.8)         | 1.29 (1.06, 1.58) | 0.012   | 1.24 (1.01, 1.54) | 0.043   |
| ≥140 and/or ≥90                           | 6757 | 852 (12.6)        | 1.71 (1.40, 2.08) | <0.001  | 1.53 (1.23, 1.91) | <0.001  |

\*Adjusted for age, sex, study center, body mass index (BMI), smoking, family history of diabetes, SBP, DBP, fasting glucose (FG), total cholesterol (TC), triglycerides (TG), creatinine, folate and the use of antihypertensive drugs at baseline, as well as use of calcium channel blockers (CCB) or diuretics during the treatment period and VTV in SBP, VTV in DBP. DBP, diastolic blood pressure; SBP, systolic blood pressure.

**Table S10. Association between time-averaged on-treatment blood pressure (BP) during the first 6-month treatment period and the subsequent incident diabetes**

| BP, mmHg                                  | N    | No. of events (%) | Crude Model       |         | Adjusted Model*   |         |
|-------------------------------------------|------|-------------------|-------------------|---------|-------------------|---------|
|                                           |      |                   | OR (95%CI)        | P value | OR (95%CI)        | P value |
| <b>Time-averaged on-treatment SBP</b>     |      |                   |                   |         |                   |         |
| <120                                      | 565  | 47 (8.3)          | 1.04 (0.74, 1.47) | 0.800   | 1.10 (0.77, 1.57) | 0.591   |
| 120 to <130                               | 2065 | 165 (8.0)         | <i>ref.</i>       |         | <i>ref.</i>       |         |
| 130 to <140                               | 4073 | 410 (10.1)        | 1.29 (1.07, 1.56) | 0.009   | 1.23 (1.01, 1.49) | 0.044   |
| ≥140                                      | 8249 | 988 (12.0)        | 1.57 (1.32, 1.86) | <0.001  | 1.41 (1.16, 1.70) | <0.001  |
| <b>Time-averaged on-treatment DBP</b>     |      |                   |                   |         |                   |         |
| <70                                       | 440  | 43 (9.8)          | 0.94 (0.67, 1.31) | 0.721   | 0.96 (0.67, 1.36) | 0.805   |
| 70 to <80                                 | 3614 | 373 (10.3)        | <i>ref.</i>       |         | <i>ref.</i>       |         |
| 80 to <90                                 | 6958 | 746 (10.7)        | 1.04 (0.92, 1.19) | 0.526   | 1.05 (0.91, 1.21) | 0.495   |
| ≥90                                       | 3940 | 448 (11.4)        | 1.11 (0.96, 1.29) | 0.143   | 1.15 (0.96, 1.37) | 0.131   |
| <b>Time-averaged on-treatment SBP/DBP</b> |      |                   |                   |         |                   |         |
| <130 and <80                              | 1460 | 119 (8.2)         | <i>ref.</i>       |         | <i>ref.</i>       |         |
| 130 to <140<br>and/or 80 to <90           | 4512 | 445 (9.9)         | 1.23 (1.00, 1.52) | 0.052   | 1.18 (0.94, 1.47) | 0.151   |
| ≥140 and/or ≥90                           | 8980 | 1046 (11.7)       | 1.49 (1.22, 1.81) | <0.001  | 1.32 (1.06, 1.63) | 0.013   |

\*Adjusted for age, sex, study center, body mass index (BMI), smoking, family history of diabetes, SBP, DBP, fasting glucose (FG), total cholesterol (TC), triglycerides (TG), creatinine, folate and the use of antihypertensive drugs at baseline, as well as use of calcium channel blockers (CCB) or diuretics during the treatment period.

DBP, diastolic blood pressure; SBP, systolic blood pressure.

**Table S11. Association between time-averaged on-treatment blood pressure (BP) during the first 24-month treatment period and the subsequent incident diabetes**

| BP, mmHg                                  | N    | No. of events (%) | Crude Model       |         | Adjusted Model*   |         |
|-------------------------------------------|------|-------------------|-------------------|---------|-------------------|---------|
|                                           |      |                   | OR (95%CI)        | P value | OR (95%CI)        | P value |
| <b>Time-averaged on-treatment SBP</b>     |      |                   |                   |         |                   |         |
| <120                                      | 275  | 25 (9.1)          | 1.27 (0.82, 1.97) | 0.291   | 1.34 (0.85, 2.12) | 0.210   |
| 120 to <130                               | 2176 | 159 (7.3)         | <i>ref.</i>       |         | <i>ref.</i>       |         |
| 130 to <140                               | 4979 | 486 (9.8)         | 1.37 (1.14, 1.65) | <0.001  | 1.28 (1.05, 1.56) | 0.013   |
| ≥140                                      | 7490 | 902 (12.0)        | 1.74 (1.46, 2.07) | <0.001  | 1.54 (1.26, 1.87) | <0.001  |
| <b>Time-averaged on-treatment DBP</b>     |      |                   |                   |         |                   |         |
| <70                                       | 411  | 37 (9.0)          | 0.87 (0.61, 1.24) | 0.449   | 0.88 (0.61, 1.28) | 0.510   |
| 70 to <80                                 | 4076 | 415 (10.2)        | <i>ref.</i>       |         | <i>ref.</i>       |         |
| 80 to <90                                 | 7394 | 772 (10.4)        | 1.03 (0.91, 1.17) | 0.663   | 1.06 (0.92, 1.22) | 0.428   |
| ≥90                                       | 3039 | 348 (11.5)        | 1.14 (0.98, 1.33) | 0.087   | 1.24 (1.02, 1.51) | 0.035   |
| <b>Time-averaged on-treatment SBP/DBP</b> |      |                   |                   |         |                   |         |
| <130 and <80                              | 1296 | 92 (7.1)          | <i>ref.</i>       |         | <i>ref.</i>       |         |
| 130 to <140 and/or 80 to <90              | 5482 | 533 (9.7)         | 1.41 (1.12, 1.77) | 0.004   | 1.31 (1.03, 1.67) | 0.027   |
| ≥140 and/or ≥90                           | 8142 | 947 (11.6)        | 1.72 (1.38, 2.15) | <0.001  | 1.51 (1.18, 1.93) | 0.001   |

\*Adjusted for age, sex, study center, body mass index (BMI), smoking, family history of diabetes, SBP, DBP, fasting glucose (FG), total cholesterol (TC), triglycerides (TG), creatinine, folate and the use of antihypertensive drugs at baseline, as well as use of calcium channel blockers (CCB) or diuretics during the treatment period.

DBP, diastolic blood pressure; SBP, systolic blood pressure.

**Table S12. Association between time-averaged on-treatment blood pressure (BP) and incident diabetes in participants without the use of diuretics during the treatment period**

| BP, mm Hg                                 | N    | No. of events (%) | Crude Model       |         | Adjusted Model*   |         |
|-------------------------------------------|------|-------------------|-------------------|---------|-------------------|---------|
|                                           |      |                   | OR (95%CI)        | P value | OR (95%CI)        | P value |
| <b>Time-averaged on-treatment SBP</b>     |      |                   |                   |         |                   |         |
| <120                                      | 216  | 18 (8.3)          | 1.10 (0.66, 1.84) | 0.712   | 1.14 (0.67, 1.94) | 0.624   |
| 120 to <130                               | 1836 | 140 (7.6)         | <i>ref.</i>       |         | <i>ref.</i>       |         |
| 130 to <140                               | 3081 | 311 (10.1)        | 1.36 (1.10, 1.68) | 0.004   | 1.31 (1.05, 1.63) | 0.018   |
| ≥140                                      | 2004 | 261 (13.0)        | 1.81 (1.46, 2.25) | <0.001  | 1.66 (1.31, 2.11) | <0.001  |
| <b>Time-averaged on-treatment DBP</b>     |      |                   |                   |         |                   |         |
| <70                                       | 304  | 29 (9.5)          | 0.95 (0.63, 1.42) | 0.796   | 0.91 (0.59, 1.40) | 0.662   |
| 70 to <80                                 | 2808 | 281 (10.0)        | <i>ref.</i>       |         | <i>ref.</i>       |         |
| 80 to <90                                 | 3382 | 344 (10.2)        | 1.02 (0.86, 1.20) | 0.831   | 1.11 (0.91, 1.35) | 0.316   |
| ≥90                                       | 643  | 76 (11.8)         | 1.21 (0.92, 1.58) | 0.174   | 1.38 (1.00, 1.92) | 0.054   |
| <b>Time-averaged on-treatment SBP/DBP</b> |      |                   |                   |         |                   |         |
| <130 and <80                              | 1252 | 102 (8.2)         | <i>ref.</i>       |         | <i>ref.</i>       |         |
| 130 to <140 and /or 80-<90                | 3674 | 349 (9.5)         | 1.18 (0.94, 1.49) | 0.152   | 1.14 (0.89, 1.46) | 0.301   |
| ≥140 and/or ≥90                           | 2211 | 279 (12.6)        | 1.63 (1.28, 2.07) | <0.001  | 1.50 (1.15, 1.95) | 0.003   |

\*Adjusted for age, sex, study center, body mass index (BMI), smoking, family history of diabetes, SBP, DBP, fasting glucose (FG), total cholesterol (TC), triglycerides (TG), creatinine, folate and the use of antihypertensive drugs at baseline, as well as use of calcium channel blockers (CCB) during the treatment period.

DBP, diastolic blood pressure; SBP, systolic blood pressure.

**Table S13. Association between time-averaged on-treatment blood pressure (BP) and incident diabetes in participants with the use of diuretics during the treatment period<sup>†</sup>**

| BP, mm Hg                                 | N    | No. of events (%) | Crude Model       |         | Adjusted Model*   |         |
|-------------------------------------------|------|-------------------|-------------------|---------|-------------------|---------|
|                                           |      |                   | OR (95%CI)        | P value | OR (95%CI)        | P value |
| <b>Time-averaged on-treatment SBP</b>     |      |                   |                   |         |                   |         |
| <120                                      | 47   | 5 (10.6)          | 1.60 (0.61, 4.20) | 0.342   | 1.54 (0.57, 4.20) | 0.396   |
| 120 to <130                               | 822  | 57 (6.9)          | <i>ref.</i>       |         | <i>ref.</i>       |         |
| 130 to <140                               | 2797 | 295 (10.6)        | 1.58 (1.18, 2.13) | 0.002   | 1.50 (1.10, 2.04) | 0.010   |
| ≥140                                      | 4175 | 541 (13.0)        | 2.00 (1.50, 2.65) | <0.001  | 1.73 (1.28, 2.35) | <0.001  |
| <b>Time-averaged on-treatment DBP</b>     |      |                   |                   |         |                   |         |
| <70                                       | 187  | 213 (7.0)         | 0.59 (0.33, 1.05) | 0.074   | 0.56 (0.31, 1.03) | 0.061   |
| 70 to <80                                 | 1980 | 223 (11.3)        | <i>ref.</i>       |         | <i>ref.</i>       |         |
| 80 to <90                                 | 4052 | 470 (11.6)        | 1.03 (0.87, 1.22) | 0.700   | 1.13 (0.93, 1.38) | 0.220   |
| ≥90                                       | 1622 | 192 (11.8)        | 1.06 (0.86, 1.30) | 0.591   | 1.28 (0.97, 1.68) | 0.083   |
| <b>Time-averaged on-treatment SBP/DBP</b> |      |                   |                   |         |                   |         |
| <130 and <80                              | 351  | 23 (6.6)          | <i>ref.</i>       |         | <i>ref.</i>       |         |
| 130 to <140 and /or 80-<90                | 2944 | 302 (10.3)        | 1.63 (1.05, 2.53) | 0.029   | 1.59 (1.00, 2.51) | 0.049   |
| ≥140 and/or ≥90                           | 4546 | 573 (12.6)        | 2.06 (1.34, 3.17) | 0.001   | 1.84 (1.16, 2.91) | 0.009   |

\*Adjusted for age, sex, study center, body mass index (BMI), smoking, family history of diabetes, SBP, DBP, fasting glucose (FG), total cholesterol (TC), triglycerides (TG), creatinine, folate and the use of antihypertensive drugs at baseline, as well as use of calcium channel blockers (CCB) during the treatment period.

<sup>†</sup> There was no significant interaction between diuretics usage (no vs. yes) and time-averaged on-treatment SBP (130-<140 vs. 120-<130mmHg) on incident diabetes(*P*-interaction=0.323). DBP, diastolic blood pressure; SBP, systolic blood pressure.

**Table S14. Post-matched participant characteristics according to propensity scores \***

| Variables                             | Time-averaged on-treatment SBP<br>Categories, mmHg |                | Standardized<br>Difference, % |
|---------------------------------------|----------------------------------------------------|----------------|-------------------------------|
|                                       | 120 to <130                                        | 130 to <140    |                               |
| N                                     | 2483                                               | 2483           |                               |
| Age, y                                | 58.97 ± 7.22                                       | 59.07 ± 7.31   | 1.4                           |
| Male, No. (%)                         | 994 (40)                                           | 1003 (40.4)    | 0.7                           |
| Body mass index (mean ± SD)           | 24.55 ± 3.51                                       | 24.57 ± 3.52   | 0.4                           |
| Current smoking, No. (%)              | 529 (21.3)                                         | 546 (22.0)     | 1.7                           |
| Current alcohol drinking, No. (%)     | 563 (22.7)                                         | 572 (23.0)     | 0.9                           |
| Family history of diabetes, No. (%)   | 84 (3.4)                                           | 87 (3.5)       | 0.7                           |
| Enalapril group, No. (%)              | 1241 (50.0)                                        | 1270 (51.1)    | 2.3                           |
| <b>BP, mmHg</b>                       |                                                    |                |                               |
| SBP at baseline                       | 157.32 ± 15.70                                     | 156.93 ± 15.20 | 2.5                           |
| DBP at baseline                       | 92.38 ± 10.69                                      | 91.98 ± 10.70  | 3.7                           |
| <b>Laboratory results, mmol/L</b>     |                                                    |                |                               |
| Total cholesterol                     | 5.44 ± 1.12                                        | 5.44 ± 1.15    | 0.5                           |
| HDL-C                                 | 1.36 ± 0.36                                        | 1.36 ± 0.37    | 0.7                           |
| Triglycerides                         | 1.57 ± 0.84                                        | 1.57 ± 0.83    | 0.6                           |
| Fasting glucose, mg/dL                | 95.61 ± 12.07                                      | 95.87 ± 12.27  | 2.1                           |
| Creatinine, µmol/L                    | 65.37 ± 15.84                                      | 65.65 ± 16.94  | 1.7                           |
| Folate, ng/mL                         | 8.72 ± 4.03                                        | 8.63 ± 4.02    | 2.3                           |
| tHcy, µmol/L                          | 14.18 ± 8.34                                       | 14.17 ± 8.94   | 0.1                           |
| <b>Medication use, No. (%)</b>        |                                                    |                |                               |
| Antihypertensive drugs at baseline    | 1079 (43.5)                                        | 1116 (44.9)    | 3.0                           |
| Lipid lowering drugs at baseline      | 22 (0.9)                                           | 30 (1.2)       | 3.2                           |
| Antiplatelet drugs at baseline        | 68 (2.7)                                           | 76 (3.1)       | 1.9                           |
| CCB during the treatment period       | 1647 (66.3)                                        | 1631 (65.7)    | 1.4                           |
| Diuretics during the treatment period | 790 (31.8)                                         | 841 (33.9)     | 4.4                           |

\*Variables are presented as Mean ± SD or n (%).

BP, blood pressure; CCB, Calcium channel blockers; DBP, diastolic blood pressure; HDL-C, high-density lipoprotein cholesterol; SBP, systolic blood pressure; tHcy, total homocysteine.

**Table S15. Association between time-averaged on-treatment blood pressure (BP) and incident impaired fasting glucose\***

| BP, mmHg                                  | N    | No. of events (%) | Crude Model       |         | Adjusted Model <sup>†</sup> |         |
|-------------------------------------------|------|-------------------|-------------------|---------|-----------------------------|---------|
|                                           |      |                   | OR (95%CI)        | P value | OR (95%CI)                  | P value |
| <b>Time-averaged on-treatment SBP</b>     |      |                   |                   |         |                             |         |
| <120                                      | 170  | 60 (35.3)         | 0.92 (0.66, 1.29) | 0.640   | 0.94 (0.66, 1.32)           | 0.701   |
| 120 to <130                               | 1649 | 612 (37.1)        | <i>ref.</i>       |         | <i>ref.</i>                 |         |
| 130 to <140                               | 3349 | 1416 (42.3)       | 1.24 (1.10, 1.40) | <0.001  | 1.17 (1.03, 1.33)           | 0.019   |
| ≥140                                      | 3299 | 1466 (44.4)       | 1.36 (1.20, 1.53) | <0.001  | 1.19 (1.04, 1.37)           | 0.012   |
| <b>Time-averaged on-treatment DBP</b>     |      |                   |                   |         |                             |         |
| <70                                       | 301  | 113 (37.5)        | 0.79 (0.62, 1.02) | 0.066   | 0.77 (0.60, 1.00)           | 0.050   |
| 70 to <80                                 | 2780 | 1197 (43.1)       | <i>ref.</i>       |         | <i>ref.</i>                 |         |
| 80 to <90                                 | 4146 | 1712 (41.3)       | 0.93 (0.84, 1.03) | 0.145   | 0.98 (0.87, 1.10)           | 0.690   |
| ≥90                                       | 1240 | 532 (42.9)        | 0.99 (0.87, 1.14) | 0.927   | 1.07 (0.89, 1.27)           | 0.483   |
| <b>Time-averaged on-treatment SBP/DBP</b> |      |                   |                   |         |                             |         |
| <130 and <80                              | 1002 | 377 (37.6)        | <i>ref.</i>       |         | <i>ref.</i>                 |         |
| 130 to <140 and/or 80 to <90              | 3814 | 1568 (41.1)       | 1.16 (1.00, 1.34) | 0.045   | 1.12 (0.96, 1.30)           | 0.159   |
| ≥140 and/or ≥90                           | 3651 | 1609 (44.1)       | 1.31 (1.13, 1.51) | <0.001  | 1.18 (1.01, 1.39)           | 0.043   |

\*Subjects with baseline FG<100 mg/dL and without incident diabetes during follow-up were included in the analysis.

<sup>†</sup> Adjusted for age, sex, study center, body mass index (BMI), smoking, family history of diabetes, SBP, DBP, fasting glucose (FG), total cholesterol (TC), triglycerides (TG), creatinine, folate and the use of antihypertensive drugs at baseline, as well as use of calcium channel blockers (CCB) or diuretics during the treatment period.

DBP, diastolic blood pressure; SBP, systolic blood pressure.



**Table S16. Association between time-averaged on-treatment blood pressure (BP) and physician-diagnosed diabetes or use of glucose-lowering drugs during follow-up<sup>†</sup>**

| BP, mm Hg                                 | N    | No. of events (%) | Crude Model       |         | Adjusted Model*   |         |
|-------------------------------------------|------|-------------------|-------------------|---------|-------------------|---------|
|                                           |      |                   | HR (95%CI)        | P value | HR (95%CI)        | P value |
| <b>Time-averaged on-treatment SBP</b>     |      |                   |                   |         |                   |         |
| <130                                      | 2921 | 22 (0.8)          | <i>ref.</i>       |         | <i>ref.</i>       |         |
| 130 to <140                               | 5878 | 56 (1.0)          | 1.26 (0.77, 2.07) | 0.354   | 1.47 (0.88, 2.45) | 0.143   |
| ≥140                                      | 6179 | 89 (1.4)          | 1.95 (1.22, 3.10) | 0.005   | 2.34 (1.39, 3.93) | 0.001   |
| <b>Time-averaged on-treatment DBP</b>     |      |                   |                   |         |                   |         |
| <80                                       | 5279 | 55 (1.0)          | <i>ref.</i>       |         | <i>ref.</i>       |         |
| 80 to <90                                 | 7434 | 76 (1.0)          | 1.01 (0.71, 1.43) | 0.951   | 1.25 (0.84, 1.87) | 0.270   |
| ≥90                                       | 2265 | 36 (1.6)          | 1.64 (1.08, 2.51) | 0.021   | 2.67 (1.52, 4.69) | <0.001  |
| <b>Time-averaged on-treatment SBP/DBP</b> |      |                   |                   |         |                   |         |
| <130 and <80                              | 1603 | 12 (0.8)          | <i>ref.</i>       |         | <i>ref.</i>       |         |
| 130 to <140 and/or 80 to <90              | 6618 | 61 (0.9)          | 1.25 (0.67, 2.32) | 0.477   | 1.43 (0.74, 2.74) | 0.285   |
| ≥140 and/or ≥90                           | 6757 | 94 (1.4)          | 1.93 (1.06, 3.53) | 0.031   | 2.40 (1.24, 4.65) | 0.009   |

\*Adjusted for age, sex, study center, body mass index (BMI), smoking, family history of diabetes, SBP, DBP, fasting glucose (FG), total cholesterol (TC), triglycerides (TG), creatinine, folate and the use of antihypertensive drugs at baseline, as well as use of calcium channel blockers (CCB) or diuretics during the treatment period.

†The proportional hazards' assumption was checked using global statistical tests based on the scaled Schoenfeld residuals in each model. No clear evidence was found against the proportional hazards' assumption in the model for time-averaged on-treatment SBP ( $P=0.154$ ), time-averaged on-treatment DBP ( $P=0.070$ ) and time-averaged on-treatment SBP/DBP ( $P=0.140$ ).

DBP, diastolic blood pressure; SBP, systolic blood pressure.

**Table S17. Association between time-averaged on-treatment blood pressure (BP) and regression to normal fasting glucose (FG) levels (<100mg/dL)\***

| BP, mm Hg                                 | N    | No. of events (%) | Crude Model       |         | Adjusted Model <sup>†</sup> |         |
|-------------------------------------------|------|-------------------|-------------------|---------|-----------------------------|---------|
|                                           |      |                   | OR (95%CI)        | P value | OR (95%CI)                  | P value |
| <b>Time-averaged on-treatment SBP</b>     |      |                   |                   |         |                             |         |
| <130                                      | 990  | 311 (31.4)        | <i>ref.</i>       |         | <i>ref.</i>                 |         |
| 130 to <140                               | 2275 | 543 (23.9)        | 0.68 (0.58, 0.81) | <0.001  | 0.76 (0.63, 0.90)           | 0.002   |
| ≥140                                      | 2555 | 548 (21.4)        | 0.60 (0.51, 0.70) | <0.001  | 0.69 (0.57, 0.84)           | <0.001  |
| <b>Time-averaged on-treatment DBP</b>     |      |                   |                   |         |                             |         |
| <70                                       | 168  | 43 (25.6)         | 1.01 (0.70, 1.45) | 0.954   | 1.15 (0.78, 1.69)           | 0.493   |
| 70 to <80                                 | 1776 | 451 (25.4)        | <i>ref.</i>       |         | <i>ref.</i>                 |         |
| 80 to <90                                 | 2973 | 693 (23.3)        | 0.89 (0.78, 1.02) | 0.104   | 0.81 (0.69, 0.95)           | 0.009   |
| ≥90                                       | 903  | 215 (23.8)        | 0.92 (0.76, 1.11) | 0.370   | 0.77 (0.61, 0.99)           | 0.038   |
| <b>Time-averaged on-treatment SBP/DBP</b> |      |                   |                   |         |                             |         |
| <130 and <80                              | 530  | 178 (33.6)        | <i>ref.</i>       |         | <i>ref.</i>                 |         |
| 130 to <140 and/or 80 to <90              | 2526 | 623 (24.7)        | 0.65 (0.53, 0.79) | <0.001  | 0.71 (0.57, 0.89)           | 0.002   |
| ≥140 and/or ≥90                           | 2764 | 601 (21.7)        | 0.55 (0.45, 0.67) | <0.001  | 0.64 (0.51, 0.81)           | <0.001  |

\*

Subjects with baseline FG ≥100 and <126 mg/dL, and without physician-diagnosed diabetes, or use of glucose-lowering drugs during follow-up were included.

<sup>†</sup> Adjusted for age, sex, study center, body mass index (BMI), smoking, family history of diabetes, SBP, DBP, fasting glucose (FG), total cholesterol (TC), triglycerides (TG), creatinine, folate and the use of antihypertensive drugs at baseline, as well as use of calcium channel or diuretics during the treatment period.

**Abbreviations:** DBP, diastolic blood pressure; SBP, systolic blood pressure.

**Figure S1. Flow chart of the study participants.**

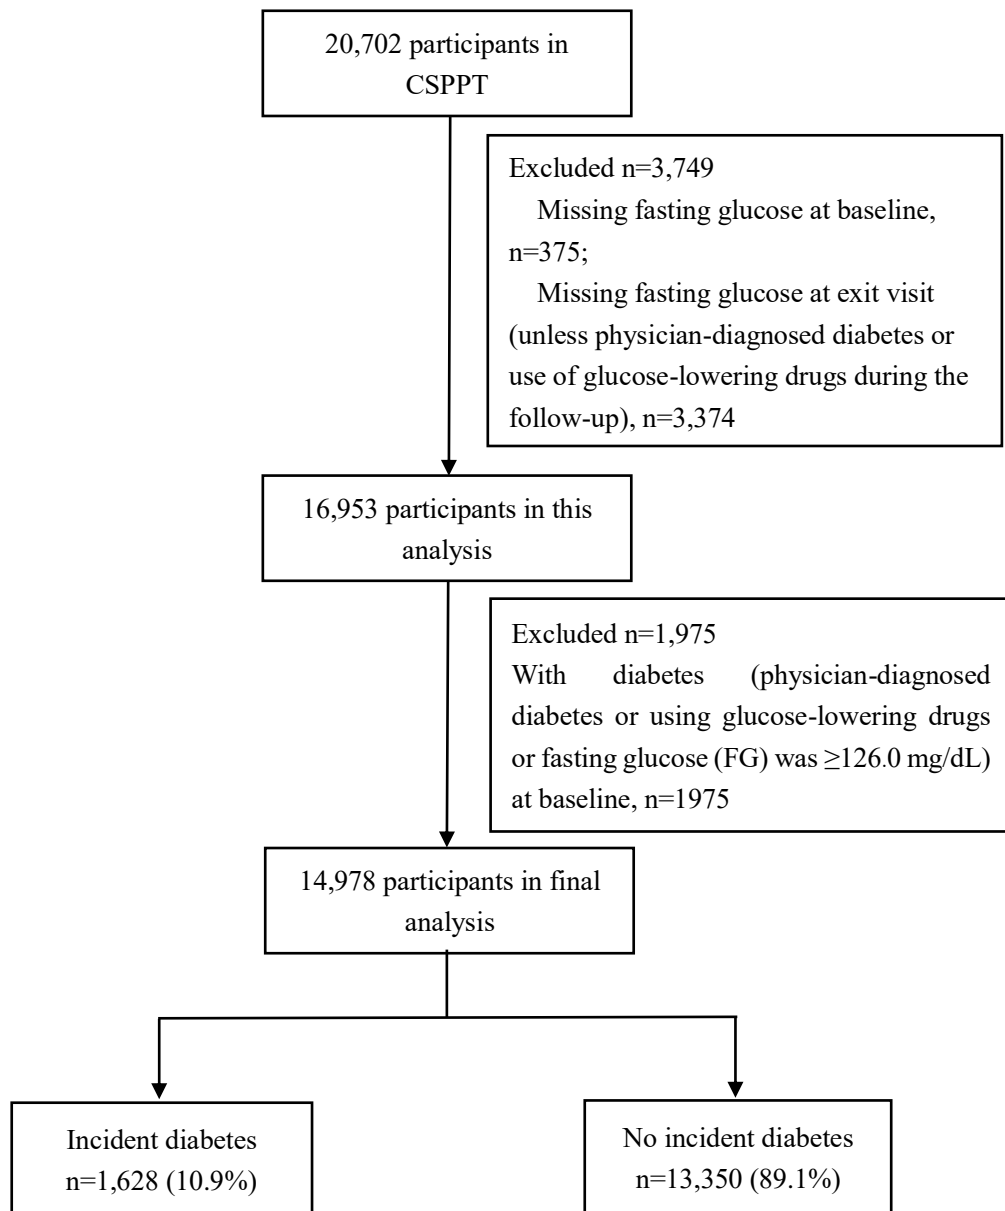

CSPPT, China Stroke Primary Prevention Trial; FG, fasting glucose.

**Figure S2. Standardized differences of participant characteristics before and after matched according to propensity scores by the degree of time-averaged on-treatment SBP (120-<130 vs. 130-<140 mmHg) control.**

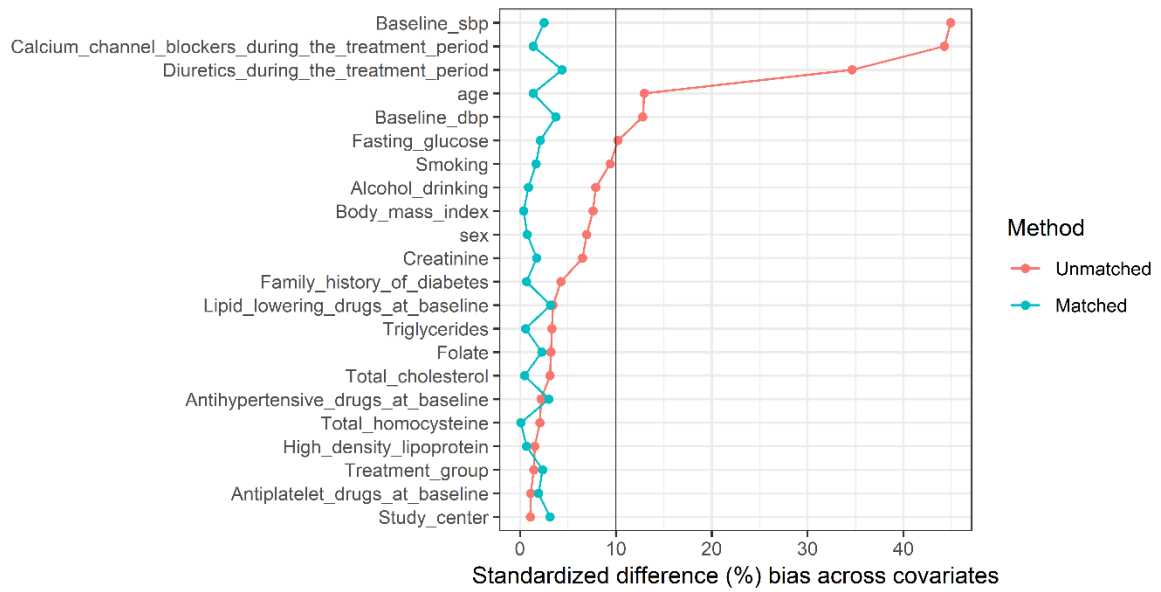

**Figure S3. Tight blood pressure control and the risk of incident diabetes.**

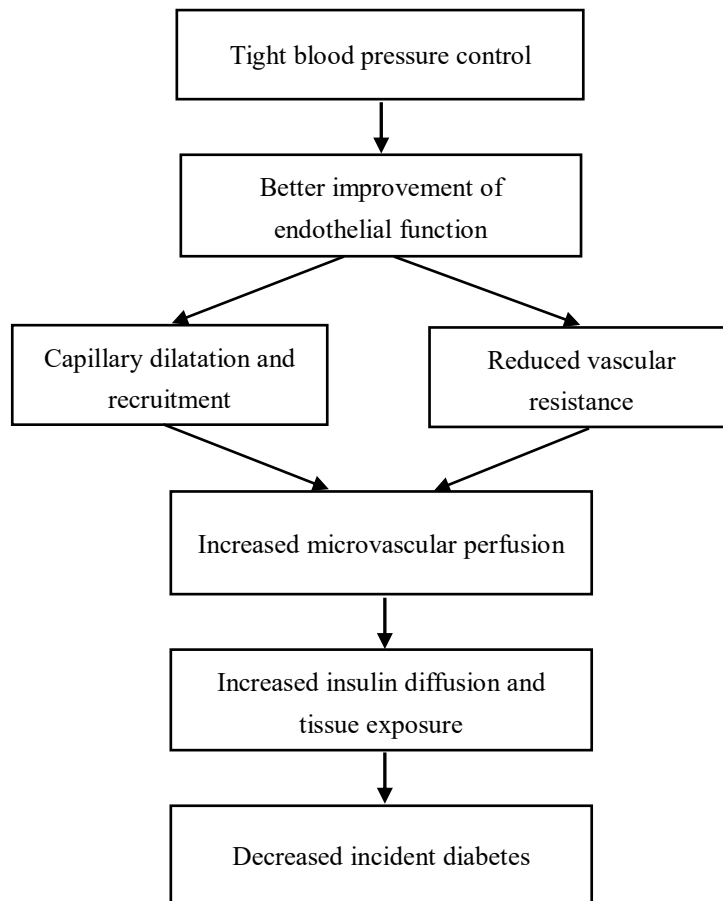

Supplement: JAH3-9-e017015-s001.pdf [file JAH3-9-e017015-s001.pdf]
